# Supplementary material for: Rapid fabrication of hollow and yolk–shell α-Fe2O3 particles with applications to enhanced photo-Fenton reactions
Source: Royal Society of Chemistry journal article supplement (doi:10.1039/c7ra06621j), 2017-01-01
Supplement: c7ra06621j1.pdf [file c7ra06621j1.pdf]

## Supporting Information

### **Rapid Fabrication of Hollow and Yolk-shell $\alpha$ -Fe<sub>2</sub>O<sub>3</sub> Particles with Applications to Enhanced Photo-Fenton Reactions**

**Yueheng Zhang,<sup>a</sup> Yang Su,<sup>a</sup> Yingqing Wang,<sup>a</sup> Jibao He,<sup>b</sup> Gary L. McPherson,<sup>c</sup> Vijay T. John<sup>a\*</sup>**

a. Department of Chemical and Biomolecular Engineering, Tulane University, New Orleans, LA, 70118, USA. E-mail: [vj@tulane.edu](mailto:vj@tulane.edu)

b. Coordinated Instrumentation Facility, Tulane University, New Orleans, LA, 70118, USA

c. Department of Chemistry, Tulane University, New Orleans, LA, 70118, USA

**S1. The photo-Fenton reactions on Fe<sub>2</sub>O<sub>3</sub> hollow microspheres and Fe<sub>2</sub>O<sub>3</sub> yolk-shell microspheres, with evolution of pH during reaction.**

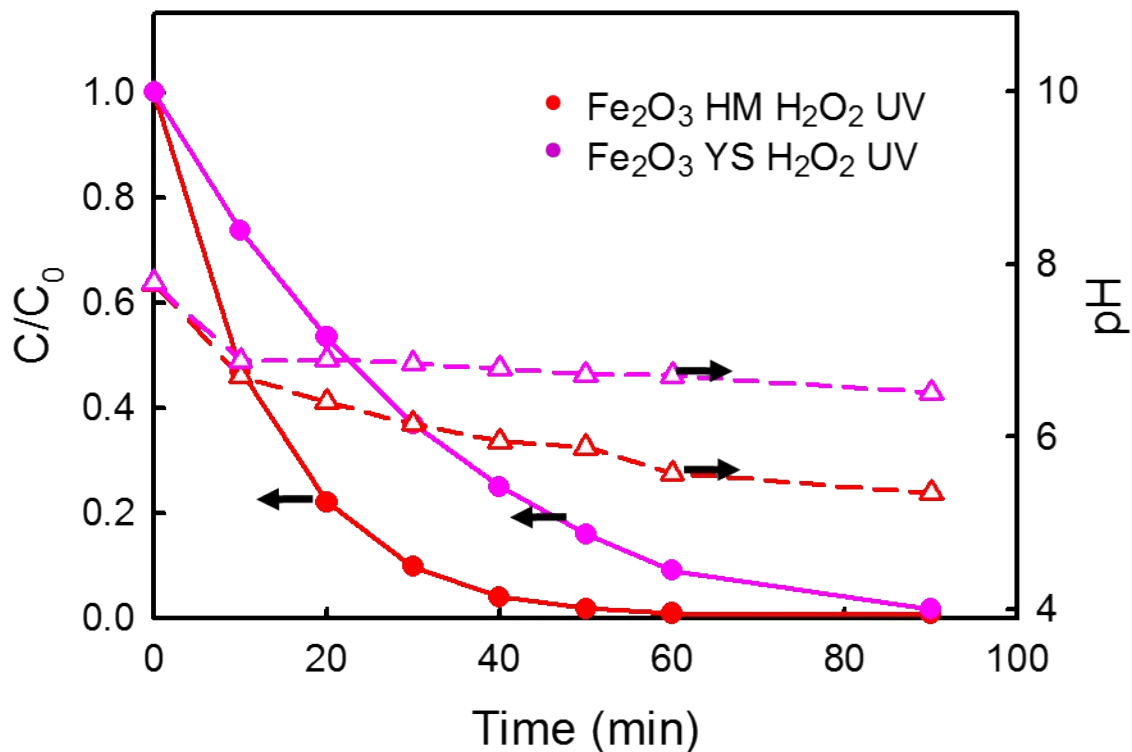

**Fig. S1.** Curves of photo-catalytical reactions on H<sub>2</sub>O<sub>2</sub>+Fe<sub>2</sub>O<sub>3</sub> hollow microspheres (HM)+UV (red), and H<sub>2</sub>O<sub>2</sub>+Fe<sub>2</sub>O<sub>3</sub> yolk shell (YS) microspheres+UV systems (pink), and the corresponding pH during the photocatalytic reactions.

The pH changes were monitored throughout the photo-Fenton reaction. All the experiments started with pH at 7.8 prior to the addition of the heterogeneous catalyst. The pH decreases from 7.8 at the start of the reaction to about 5.4 at the end of reaction due to acidic reaction intermediates and the final evolution of CO<sub>2</sub> and H<sub>2</sub>O. <sup>1</sup>

## S2. Measurement of $\cdot\text{OH}$ radicals generated during the photo-Fenton reaction with $\text{Fe}_2\text{O}_3$ hollow microspheres as catalysts.

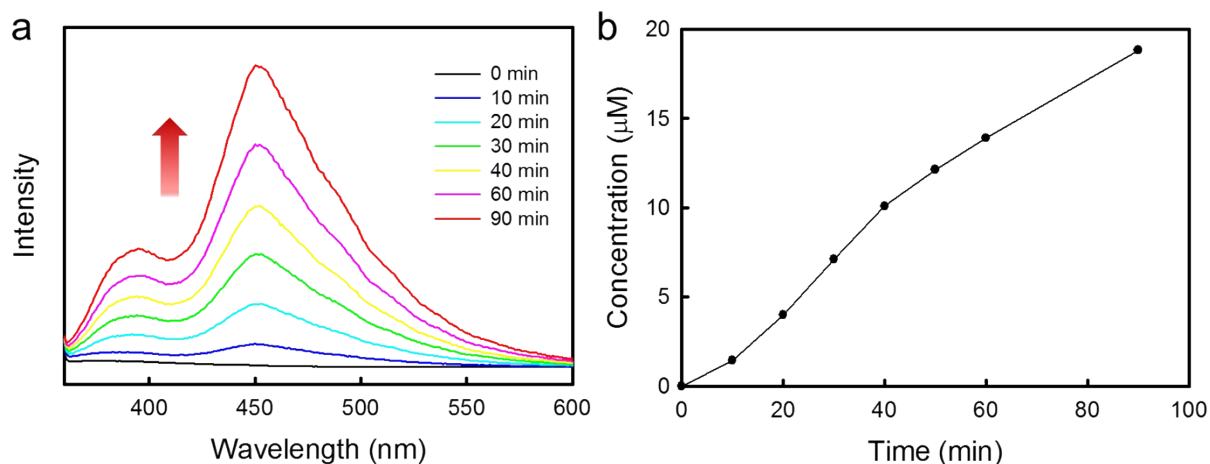

**Fig. S2.** (a) Fluorescence spectral changes during the irradiation of the  $\text{Fe}_2\text{O}_3$  hollow microspheres in  $10^{-3}$  M coumarin solution. (b)  $\cdot\text{OH}$  radicals generated during the irradiation of the  $\text{Fe}_2\text{O}_3$  hollow microspheres in  $10^{-3}$  M coumarin solution.

The  $\cdot\text{OH}$  produced during the photo-Fenton reaction was monitored using coumarin as a scavenger.<sup>2,3</sup> Coumarin is a non-fluorescent molecule, which reacts with  $\cdot\text{OH}$  to form the highly fluorescent molecule 7-hydroxycoumarin. The measurement was done in the same manner as the degradation of MB through photo-Fenton with  $\text{Fe}_2\text{O}_3$  microspheres, except that MB solution was replaced by 10 ml  $10^{-3}$  M coumarin solution.<sup>2</sup> Aliquots taken at different times were centrifuged, and the supernatant was diluted twice with ethanol. The fluorescence spectra of 7-hydroxycoumarin were obtained on a PTI Felix 32 MD-5020 spectrofluorimeter with an excitation wavelength of 332 nm. The concentration of  $\cdot\text{OH}$  produced in the system was calculated from a calibration curve generated by 7-hydroxycoumarin standard solutions at different concentrations.

The measurement was done in the same manner as the degradation of MB through photo-Fenton with  $\text{Fe}_2\text{O}_3$  microspheres, except that MB solution was replaced by 10 ml  $10^{-3}$  M coumarin solution.<sup>2</sup> Aliquots taken at different times were centrifuged, and the supernatant was diluted twice with ethanol. The spectra of 7-hydroxycoumarin were obtained on a PTI Felix 32 MD-5020 spectrofluorimeter with an excitation wavelength of 332 nm. The concentration of  $\cdot\text{OH}$  produced in the system was calculated from a calibration curve generated by 7-hydroxycoumarin standard solutions at different concentrations.

Fig. S2a shows the changes of fluorescence spectra from suspension of Fe<sub>2</sub>O<sub>3</sub> hollow microspheres with 10<sup>-3</sup> M coumarin under UV irradiation. Fig. S2b shows the rate of production of ·OH over a 90-minute reaction period.

### S3. XPS survey spectrum of SiO<sub>2</sub>@Fe<sub>2</sub>O<sub>3</sub> microspheres.

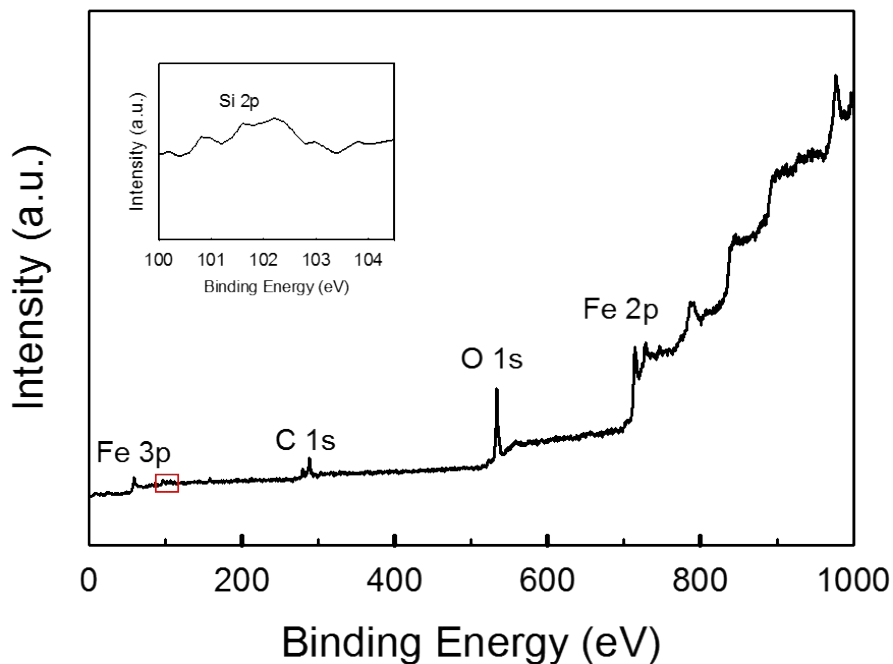

**Fig. S3.** XPS survey spectrum of SiO<sub>2</sub>@Fe<sub>2</sub>O<sub>3</sub> microspheres. The inset shows the weak peak of Si 2p.

XPS characterization of the particle surface is shown in Figure S3 to provide additional evidence of the encapsulation of SiO<sub>2</sub> in the SiO<sub>2</sub>@Fe<sub>2</sub>O<sub>3</sub> yolk-shell microsphere. The experiment was done on a VG Scientific MKII system using an Al K $\alpha$  anode as excitation source ( $h\nu = 1486.6$  eV). The pressure in the chamber during analysis was  $<5 \times 10^{-8}$  mbar. Fig. S3 shows that the Si signal is very weak, indicating the encapsulation of SiO<sub>2</sub> nanoparticles within the Fe<sub>2</sub>O<sub>3</sub> shell.

## References

- 1 Q. Wang, S. Tian and P. Ning, *Ind Eng Chem Res*, 2014, **53**, 643-649.
- 2 Q. Xiang, J. Yu and P. K. Wong, *J Colloid Interface Sci*, 2011, **357**, 163-167.
- 3 H. Czili and A. Horváth, *Appl Catal B*, 2008, **81**, 295-302.
